## Supplemental Material

### Development of the Navigational Map in Homing Pigeons: Differences between Pigeons of different Age

Ingo Schiffner, Roswitha Wiltschko (i.schiffner@uq.edu.au)

**Table S1.** Comparing the behavior of the three age groups during the homing flight

| Variable                        | Juveniles | Yearlings | Old birds | Difference<br>Yearlings/Old<br>significant? |
|---------------------------------|-----------|-----------|-----------|---------------------------------------------|
|                                 | median    | median    | median    |                                             |
| Sites involved                  | 4         | 11        | 11        |                                             |
| Number PoDs.                    | 2.2       | 1.5       | 1.7       | 25.0                                        |
| Time to 1 <sup>st</sup> PoD (s) | 240       | 142.5     | 105       | 26.5                                        |
| Distance (m)                    | 299       | 491       | 552       | 6.31                                        |
| <i>Initial Phase</i>            |           |           |           |                                             |
| $\Delta$ home                   | 18°       | 30°       | 33°       | 26.5                                        |
| Vector length                   | 0.33      | 0.66      | 0.63      | 26.0                                        |
| Steadiness                      | 0.21      | 0.30      | 0.33      | 26.0                                        |
| Flying speed (km/h)             | 50        | 53        | 51        | <b>5.0**</b>                                |
| <i>Departure Phase</i>          |           |           |           |                                             |
| $\Delta$ home                   | -15°      | 71°       | 27°       | 16.0                                        |
| Vector length                   | 0.62      | 0.70      | 0.90      | 15.0                                        |
| Steadiness                      | 0.66      | 0.80      | 0.85      | 14.5                                        |
| Flying speed (km/h)             | 57        | 62        | 57        | <b>3.5**</b>                                |
| <i>Final Homing Phase</i>       |           |           |           |                                             |
| $\Delta$ home                   | 19°       | 13°       | 3°        | <b>0.0**</b>                                |
| Vector length                   | 0.81      | 0.98      | 0.99      | 17.5                                        |
| Steadiness                      | 0.70      | 0.82      | 0.85      | 16.5                                        |
| Flying speed (km/h)             | 57        | 61        | 56        | 5.5                                         |

PoD, Point of decision;  $\Delta$  home, angular deviation of the mean heading from the home direction; vector length, length of the mean vector based on the headings. \*\*, P < 0.01

## Supplemental Material

### Development of the Navigational Map in Homing Pigeons: Differences between Pigeons of different Age

Ingo Schiffner, Roswitha Wiltschko (i.schiffner@uq.edu.au)

**Table S2.** Results of two way ANOVA for the short-term correlation dimension

| Site | Age of pigeons |          |       | Distance from home |          |       | Interactions |          |       |
|------|----------------|----------|-------|--------------------|----------|-------|--------------|----------|-------|
|      | Df             | F-Values | Sign? | Df                 | F-Values | Sign? | Df           | F-Values | Sign? |
| CP   | 2              | 0.909    | n.s.  | 11                 | 12.702   | ***   | 13           | 0.963    | n.s.  |
| GT   | 2              | 21.143   | ***   | 18                 | 6.460    | ***   | 22           | 0.473    | n.s.  |
| EP   | 2              | 7.895    | ***   | 35                 | 9.765    | ***   | 29           | 1.298    | n.s.  |
| NI   | 1              | 21.916   | ***   | 26                 | 10.911   | ***   | 18           | 0.428    | n.s.  |
| MT   | 1              | 4.577    | *     | 28                 | 3.842    | ***   | 24           | 0.590    | n.s.  |
| OB   | 1              | 10.762   | **    | 25                 | 4.606    | ***   | 24           | 0.285    | n.s.  |
| HO   | 2              | 5.866    | ***   | 56                 | 5.136    | ***   | 60           | 1.016    | n.s.  |
| HOF  | 1              | 34.719   | ***   | 33                 | 4.062    | ***   | 28           | 0.616    | n.s.  |
| AH   | 1              | 7.620    | **    | 30                 | 2.277    | ***   | 30           | 0.123    | n.s.  |
| RB   | 1              | 2.548    | n.s.  | 39                 | 2.517    | ***   | 38           | 0.749    | n.s.  |
| RAV  | 1              | 0.241    | n.s.  | 49                 | 5.254    | ***   | 48           | 0.486    | n.s.  |

Df, degrees of freedom; significance levels: n.s, not significant; \*,  $p < 0.05$ ; \*\*,  $p < 0.01$ ; \*\*\*,  $p < 0.001$ .
